# Supplementary material for: Optimization of Tissue Digestion Methods for Characterization of Photoaged Skin by Single Cell RNA Sequencing Reveals Preferential Enrichment of T Cell Subsets
Source: MDPI journal article supplement (doi:10.3390/cells13030266), 2024-01-31
Supplement: s1 [file s1]

# Supplemental Material

Table S1: BD AbSeq antibodies used to label surface proteins

| Antibodies  | Cat number | Sequeunce ID | Clone        |
|-------------|------------|--------------|--------------|
| CD117       | 940250     | AHS0165      | 104D2        |
| CD11b       | 940008     | AHS0005      | M1/70        |
| CD11c       | 940024     | AHS0056      | B-LY6        |
| CD138       | 940213     | AHS0121      | MI15         |
| CD14        | 940257     | AHS0173      | M5E2         |
| CD15        | 940274     | AHS0196      | W6D3         |
| CD16        | 940006     | AHS0053      | 3G8          |
| CD161       | 940283     | AHS0205      | HP-3G10      |
| CD19        | 940004     | AHS0030      | SJ25C1       |
| CD193       | 940245     | AHS0159      | 5E8          |
| CD1a        | 940063     | AHS0067      | HI149        |
| CD1c        | 940083     | AHS0088      | F10/21A3     |
| CD1d        | 940296     | AHS0219      | CD1d42       |
| CD206       | 940068     | AHS0072      | 19.2         |
| CD25        | 940463     | AHS0166      | M-A251       |
| CD3         | 940000     | AHS0033      | SK7          |
| CD4         | 940304     | AHS0227      | RPA-T4       |
| CD45RA      | 940011     | AHS0009      | HI100        |
| CD45RO      | 940022     | AHS0036      | UCHL1        |
| CD56        | 940380     | AHS0257      | B159         |
| CD62L       | 940387     | AHS0265      | SK11         |
| CD68        | 460076     | AHS0293      | Y1/82A       |
| CD69        | 940019     | AHS0010      | FN50         |
| CD8         | 940305     | AHS0228      | SK1          |
| CD80        | 940036     | AHS0046      | L307.4       |
| CD86        | 940025     | AHS0057      | 2331 (FUN-1) |
| FCER1A      | 940220     | AHS0129      | AER-37       |
| HLA-DR      | 940010     | AHS0035      | G46-6        |
| LAG3        | 940080     | AHS0018      | T47-530      |
| PD1 (CD279) | 940467     | AHS0190      | MIH4         |
| TCRgd       | 940057     | AHS0015      | B1           |
| TIM-3       | 940066     | AHS0016      | 7D3          |
| Vα7.2       | 460065     | AHS028Q      | OF-5A12      |

Figure S1: Cell cluster annotation plots

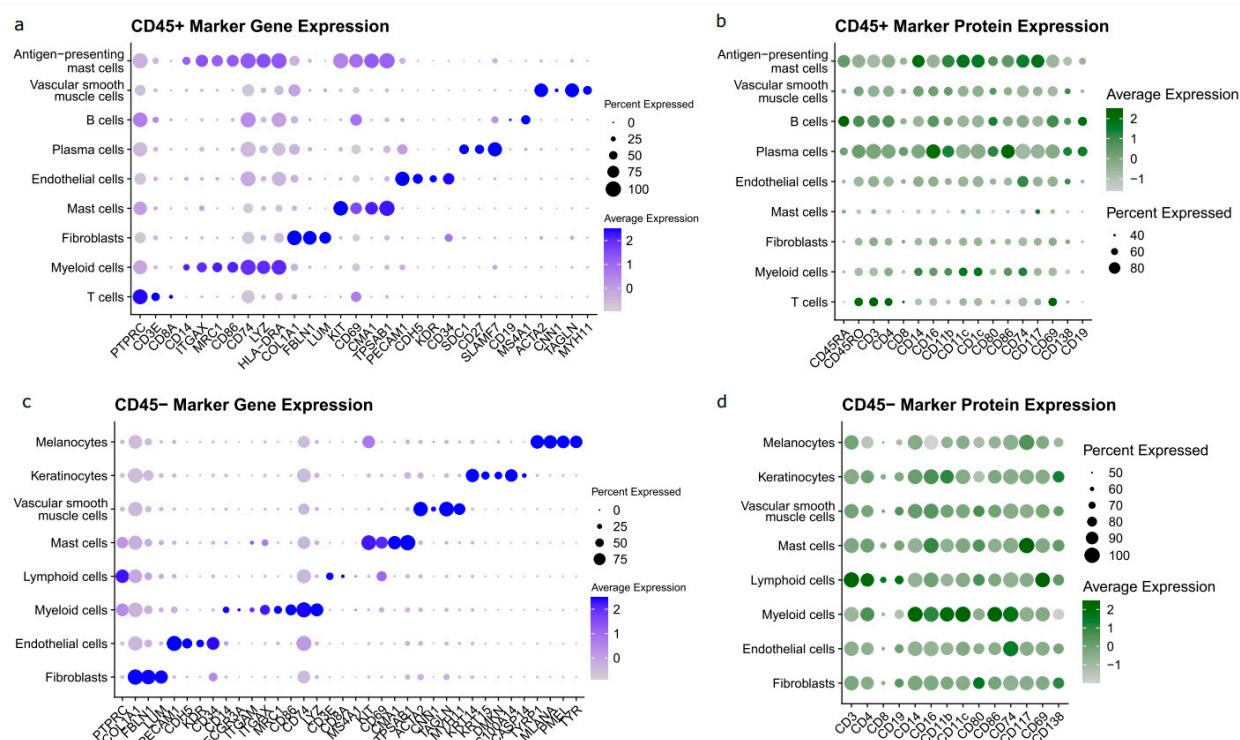

Figure S1: Cell cluster annotation plots. (a) Dot plot shows expression of genes used to annotate CD45<sup>+</sup> cell clusters. Dots are colored by average relative gene expression of cells in each cluster, and sized by the percent of cells expressing each gene. (b) Dot plot shows expression of proteins used to annotate CD45<sup>+</sup> cell clusters. Dots are colored by average relative protein expression of cells in each cluster, and sized by the percent of cells expressing each protein. (c) Same as (a), but for CD45<sup>-</sup> cell clusters. (d) Same as (b), but for CD45<sup>-</sup> cell clusters.

Figure S2: Fresh vs. frozen sequencing quality control metrics

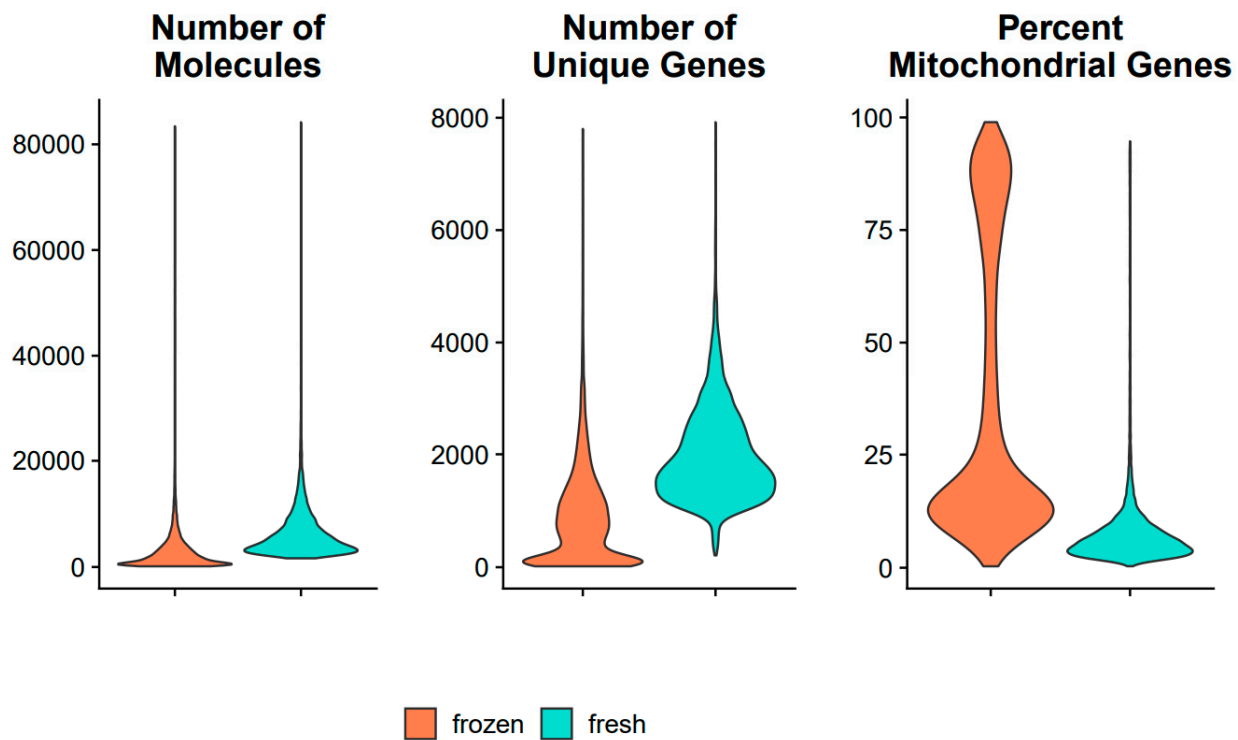

Figure S2: Fresh vs. frozen sequencing quality control metrics. Violin plots show the distribution among all CD45<sup>+</sup> cells processed using the simultaneous digestion method of the number of molecules detected (left panel), number of unique genes detected (middle panel), and the percent of mitochondrial genes detected (right panel). Frozen (coral) and fresh (turquoise) tissue states are compared.

Figure S3: Overnight digestion cell counts and viability compared to sequential and simultaneous digestions

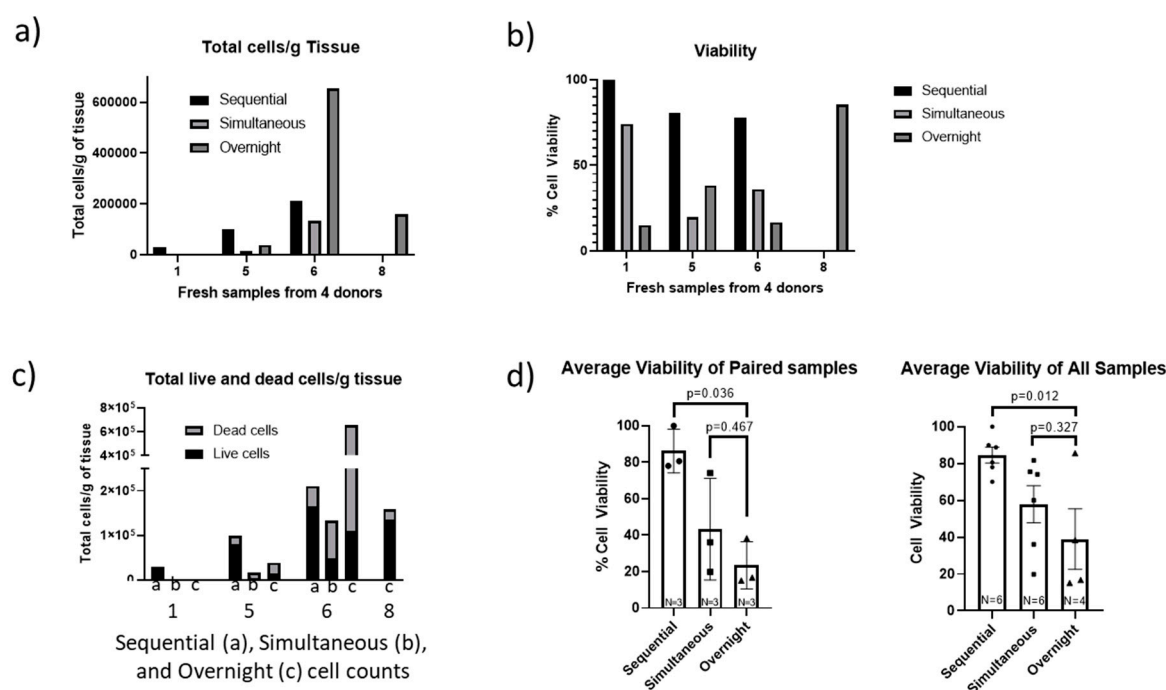

Figure S3: Overnight digestion method cell counts and viability. (a) Total cells per gram of tissue for three patients whose tissue was sizable enough to cut into 3 roughly 4mm sections and digest using all three (sequential, simultaneous, and overnight) digestion methods (patients #1, 5, and 6). Also shown is an additional patient (#8) whose tissue was digested exclusively with the overnight method. (b) Cell viability for the same samples from (a) are shown. (c) Overnight digestion method of live and dead cell counts for each total cell count shown in part (a). (d) Average cell viability of both the paired samples (N=3, patients #1, 5, and 6) with paired t-tests demonstrating significant difference between sequential and overnight digestion methods ( $p=0.036$ ) but not between simultaneous and overnight digestion methods ( $p=0.467$ ) (left). The average viability for all samples is also shown (right) and there is likewise a statistically significant difference between the sequential and overnight digestion methods (unpaired t-test,  $p=0.012$ ) but not between the simultaneous and overnight methods (unpaired t-test,  $p=0.327$ ). Error bars indicate SEM.

Table S2: Cell counts for digestion methods

| <b>Sample</b> | <b>Weight (g)</b> | <b>Digestion Approach</b> | <b>Viability</b> | <b>Total Cells</b> | <b>Total cells/g of Tissue</b> |
|---------------|-------------------|---------------------------|------------------|--------------------|--------------------------------|
| <b>1a</b>     | 0.2516            | sequential                | 100              | 28,012             | 111,335                        |
| <b>1b</b>     | 0.2613            | simultaneous              | 74.14            | 1,652              | 6,322                          |
| <b>1c</b>     | 0.2327            | overnight                 | 15.15            | 1,440              | 6,188                          |
| <b>2a</b>     | 0.2261            | sequential                | 89.95            | 323,506            | 1,430,809                      |
| <b>2b</b>     | 0.2791            | simultaneous              | 81.7             | 264,586            | 947,997                        |
| <b>3a</b>     | 0.0688            | sequential                | 88.82            | 60,876             | 884,826                        |
| <b>3b</b>     | 0.0441            | simultaneous              | 75.55            | 168,130            | 3,812,472                      |
| <b>4a</b>     | 0.1406            | sequential                | 70.15            | 161,308            | 1,147,283                      |
| <b>4b</b>     | 0.1305            | simultaneous              | 60.07            | 104,584            | 801,410                        |
| <b>5a</b>     | 0.2904            | sequential                | 80.64            | 122,964            | 423,430                        |
| <b>5b</b>     | 0.2016            | simultaneous              | 19.85            | 77,880             | 386,310                        |
| <b>5c</b>     | 0.272             | overnight                 | 38.35            | 100,226            | 368,478                        |
| <b>6a</b>     | 0.2464            | sequential                | 78               | 51,853             | 210,441                        |
| <b>6b</b>     | 0.2427            | simultaneous              | 36.1             | 32,402             | 133,505                        |
| <b>6c</b>     | 0.2146            | overnight                 | 16.81            | 140,178            | 653,208                        |
| <b>7a</b>     | 0.0281            | sequential                | 60.83            | 18,439             | 656,199                        |
| <b>7b</b>     | 0.0291            | simultaneous              | 14.34            | 10,637             | 365,522                        |
| <b>8</b>      | 0.4948            | overnight                 | 85.61            | 184,450            | 372,777                        |

Figure S4: Sequential vs. simultaneous digestion methods sequencing quality control metrics

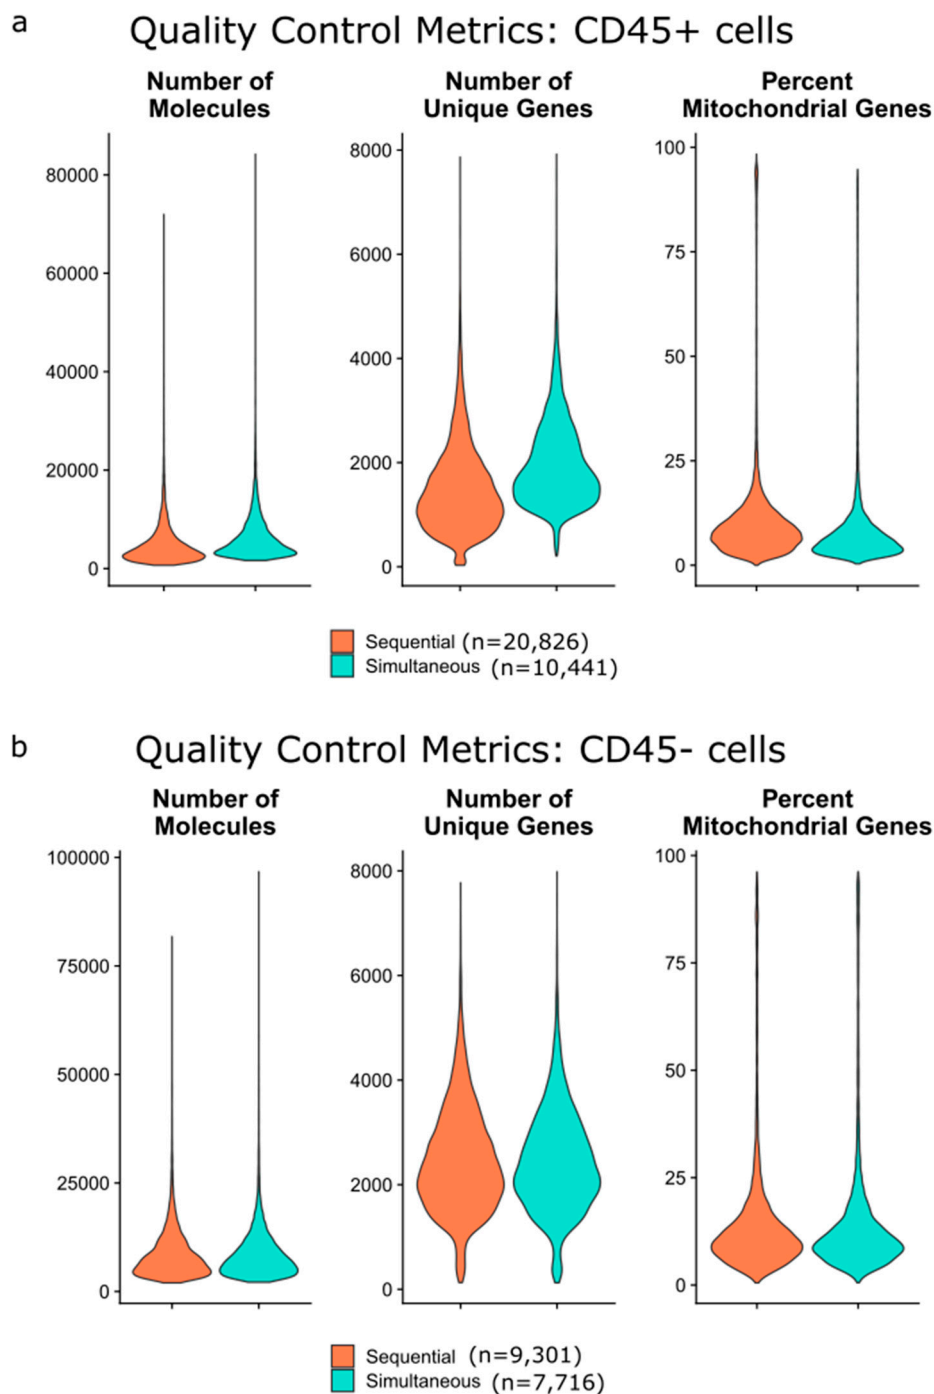

Figure S4: Sequencing quality control metrics for sequential and simultaneous digestion. (a) Violin plots show the distribution among all CD45<sup>+</sup> cells processed from fresh tissue of the number of molecules detected (left panel), number of unique genes detected (middle panel), and the percent of mitochondrial genes detected (right panel). Sequential (coral) and simultaneous (turquoise) digestion methods are compared. Number of cells per digestion method is reported in parentheses in the legend. (b) As (a), but for CD45<sup>-</sup> cells.

Figure S5: scRNA-seq of CD45<sup>+</sup> cells isolated from fresh tissue samples

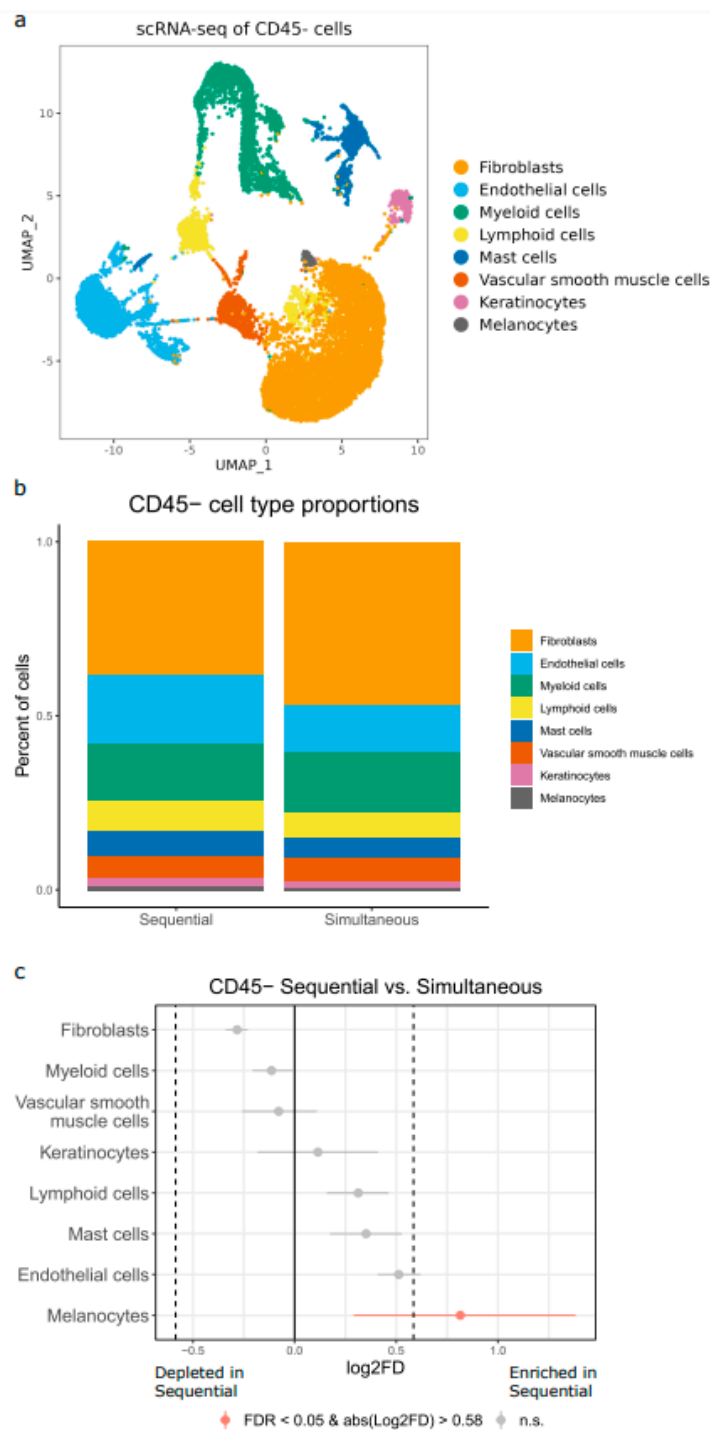

Figure S5: scRNA-seq of CD45<sup>+</sup> cells isolated from fresh tissue samples. (a) UMAP plot of 15,300 annotated CD45<sup>+</sup> cells colored by cell type. (b) Stacked bar plot showing the relative proportions of each CD45<sup>+</sup> cell type, split by digestion method. (c) Relative differences in cell proportions for each CD45<sup>+</sup> cluster, comparing sequential and simultaneous digestion methods. Red clusters are statistically significant (FDR < 0.05 and absolute log<sub>2</sub> fold change > 0.58). Larger log<sub>2</sub> fold changes indicate a higher proportion of cells in the sequential method

Table S3: Differential proportion analysis: sequential vs. simultaneous digestions, CD45<sup>+</sup> cell clusters

| Clusters                      | Sequential  | Simultaneous | obs_log2FD   | pval        | FDR         | boot_mean_log2FD | boot_CI_2.5  | boot_CI_97.5 |
|-------------------------------|-------------|--------------|--------------|-------------|-------------|------------------|--------------|--------------|
| Antigen-presenting mast cells | 0.001726765 | 0.003816411  | -1.144144748 | 0.000999001 | 0.001123876 | -1.14470096      | -1.831676983 | -0.452914018 |
| B cells                       | 0.0107161   | 0.013257005  | -0.306975007 | 0.028971029 | 0.028971029 | -0.308087727     | -0.614446266 | 0.004547486  |
| Endothelial cells             | 0.012442864 | 0.019684644  | -0.661751981 | 0.000999001 | 0.001123876 | -0.666320898     | -0.915749014 | -0.411450993 |
| Fibroblasts                   | 0.050228542 | 0.07893944   | -0.652238867 | 0.000999001 | 0.001123876 | -0.65208555      | -0.778059955 | -0.525078627 |
| Mast cells                    | 0.054850178 | 0.035251582  | 0.637808301  | 0.000999001 | 0.001123876 | 0.6373523        | 0.466202797  | 0.814537156  |
| Myeloid cells                 | 0.170543423 | 0.222556995  | -0.384035727 | 0.000999001 | 0.001123876 | -0.382544757     | -0.451193514 | -0.315727169 |
| Plasma cells                  | 0.008329101 | 0.021492417  | -1.367595058 | 0.000999001 | 0.001123876 | -1.369348605     | -1.659274075 | -1.068144843 |
| T cells                       | 0.685068563 | 0.589334137  | 0.217162547  | 0.000999001 | 0.001123876 | 0.216812804      | 0.190006099  | 0.245150496  |
| Vascular smooth muscle cells  | 0.006094464 | 0.01566737   | -1.362191699 | 0.000999001 | 0.001123876 | -1.354060985     | -1.706166716 | -1.00504211  |

Table S4: Differential proportion analysis: sequential vs. simultaneous digestions, T cell subsets

| clusters           | Sequential  | Simultaneous | obs_log2FD   | pval        | FDR         | boot_mean_log2FD | boot_CI_2.5  | boot_CI_97.5 |
|--------------------|-------------|--------------|--------------|-------------|-------------|------------------|--------------|--------------|
| ANXA1+ CD4 T cells | 0.61657647  | 0.548909339  | 0.167711949  | 0.000999001 | 0.000999001 | 0.168577261      | 0.130907016  | 0.205290628  |
| CD8 T cells        | 0.125732078 | 0.077027948  | 0.706898869  | 0.000999001 | 0.000999001 | 0.708577948      | 0.56174146   | 0.850785002  |
| KYNU+ CD4 T cells  | 0.123730447 | 0.201772324  | -0.705527749 | 0.000999001 | 0.000999001 | -0.705648696     | -0.800370569 | -0.607924741 |
| Regulatory T cells | 0.133961005 | 0.172290389  | -0.363029114 | 0.000999001 | 0.000999001 | -0.365888966     | -0.473066474 | -0.263041256 |



Table S5: Differential proportion analysis: sequential vs. simultaneous digestions, CD45<sup>+</sup> cell clusters

| clusters                     | Sequential  | Simultaneous | obs_log2FD   | pval        | FDR         | boot_mean_log2FD | boot_CI_2.5  | boot_CI_97.5 |
|------------------------------|-------------|--------------|--------------|-------------|-------------|------------------|--------------|--------------|
| Endothelial cells            | 0.197871832 | 0.138696655  | 0.512633255  | 0.000999001 | 0.001998002 | 0.515356024      | 0.408680935  | 0.619959344  |
| Fibroblasts                  | 0.382592061 | 0.465397924  | -0.282657837 | 0.000999001 | 0.001998002 | -0.282622389     | -0.338819316 | -0.230615015 |
| Keratinocytes                | 0.024509804 | 0.022635525  | 0.114770187  | 0.244755245 | 0.244755245 | 0.110646293      | -0.181273453 | 0.409244429  |
| Lymphoid cells               | 0.091343855 | 0.073529412  | 0.312986228  | 0.000999001 | 0.001998002 | 0.313018682      | 0.158668104  | 0.462242048  |
| Mast cells                   | 0.073409852 | 0.057525952  | 0.351760746  | 0.000999001 | 0.001998002 | 0.346258467      | 0.17412362   | 0.526786847  |
| Melanocytes                  | 0.010401722 | 0.005911188  | 0.815302328  | 0.001998002 | 0.003196803 | 0.827426642      | 0.290113606  | 1.382496249  |
| Myeloid cells                | 0.160329986 | 0.173442907  | -0.113416569 | 0.015984016 | 0.021312021 | -0.112952096     | -0.20781037  | -0.008462396 |
| Vascular smooth muscle cells | 0.05954089  | 0.062860438  | -0.078271556 | 0.203796204 | 0.232909947 | -0.077944006     | -0.258042715 | 0.109007684  |
